# Supplementary material for: Analysis of Viral and Host Factors on Immunogenicity of 2018, 2019, and 2020 Southern Hemisphere Seasonal Trivalent Inactivated Influenza Vaccine in Adults in Brazil
Source: MDPI journal article supplement (doi:10.3390/v14081692), 2022-07-30
Supplement: s1 [file s1]

**Supplementary Table S1:** Impact of other populational variables on GMT-Post# and SP-Post# in 2019

|             |   |                                                        | H1N1      |           | H3N2      |           | Influenza B |           |
|-------------|---|--------------------------------------------------------|-----------|-----------|-----------|-----------|-------------|-----------|
|             |   |                                                        | H1/CA     | H1/MI     | H3/SI     | H3/SW     | B/PH        | B/CO      |
| Comorbidity | Y | GMT-Post* <sub>(corrected)</sub> (Log2)                | 3.7 (1.3) | 3.7 (1.1) | 1.8 (1.2) | 3.8 (1.4) | 2.2 (1.2)   | 3.3 (1.5) |
|             |   | SP-Post <sub>(GMT-Post*&gt;corrected cutoff)</sub> (%) | 96        | 96        | 84        | 94        | 96          | 87        |
|             | N | GMT-Post* <sub>(corrected)</sub> (Log2)                | 4.3 (1.7) | 4.0 (1.6) | 2.5 (1.8) | 4.3 (1.8) | 2.5 (1.5)   | 3.4 (1.7) |
|             |   | SP-Post <sub>(GMT-Post*&gt;corrected cutoff)</sub> (%) | 93        | 91        | 86        | 95        | 83 *        | 84        |
| Recent Flu  | Y | GMT-Post* <sub>(corrected)</sub> (Log2)                | 3.8 (1.3) | 3.9 (1.2) | 2.0 (1.6) | 4.7 (1.5) | 2.4 (1.4)   | 3.3 (1.8) |
|             |   | SP-Post <sub>(GMT-Post*&gt;corrected cutoff)</sub> (%) | 94        | 94        | 81        | 100       | 94          | 75        |
|             | N | GMT-Post* <sub>(corrected)</sub> (Log2)                | 4.0 (1.5) | 3.8 (1.4) | 2.1 (1.5) | 3.9 (1.6) | 2.3 (1.4)   | 3.4 (1.5) |
|             |   | SP-Post <sub>(GMT-Post*&gt;corrected cutoff)</sub> (%) | 94        | 94        | 85        | 94        | 81          | 97        |
| Sex         | F | GMT-Post* <sub>(corrected)</sub> (Log2)                | 3.9 (1.5) | 3.8 (1.3) | 2.2 (1.5) | 4.0 (1.5) | 2.2 (1.3)   | 3.3 (1.6) |
|             |   | SP-Post <sub>(GMT-Post*&gt;corrected cutoff)</sub> (%) | 86        | 95        | 88        | 97        | 81          | 85        |
|             | M | GMT-Post* <sub>(corrected)</sub> (Log2)                | 3.9 (1.6) | 3.8 (1.4) | 1.8 (1.5) | 3.8 (1.8) | 2.6 (1.3)   | 3.6 (1.5) |
|             |   | SP-Post <sub>(GMT-Post*&gt;corrected cutoff)</sub> (%) | 92        | 92        | 79        | 87 *      | 87          | 89        |

Statistical significance is represented as \* for p<0.05.
